# Supplementary material for: Chromosome Painting in Neotropical Long and Short-Tailed Parrots (Aves, Psittaciformes): Phylogeny and Proposal for a Putative Ancestral Karyotype for Tribe Arini
Source: Preprints.org preprint supplement (doi:10.20944/preprints201808.0198.v1), 2018-08-09
Supplement: Supplementary file 1 [file Table 1.docx]

Table 1 – List of specimens collected in the present study.

| Species | Number | Gender | Sample origin |
| --- | --- | --- | --- |
| *Amazona aestiva* | 2 | 2 ♀ | Museu Paraense Emílio Goeldi, Belém, Pará |
| *Pyrrhura frontalis* | 2 | 1 ♀ + 1 ♂ | Parque Zoológico do Rio Grande do Sul, Sapucaia do Sul, Rio Grande do Sul |
