# Supplementary material for: Chromosome Painting in Neotropical Long and Short-Tailed Parrots (Aves, Psittaciformes): Phylogeny and Proposal for a Putative Ancestral Karyotype for Tribe Arini
Source: Preprints.org preprint supplement (doi:10.20944/preprints201808.0198.v1), 2018-08-09
Supplement: Supplementary file 3 [file Table 3.docx]

Table 3- Correspondence between syntenic groups of Psitaciformes species analyzed by FISH with *Gallus gallus* probes.

| **Distribution** | **Species** | **Chromosomes associations** | | | | | | **References** |
| --- | --- | --- | --- | --- | --- | --- | --- | --- |
|  |  | 1q/4 | 6/7 | 8/9 | 4/8/9 | 5/6/7 | 2/9 |  |
| Neotropical Psittacidae | *Anodorhynchus hyacinthinus* | * | * | * |  |  |  | [10] |
| *Ara chloropterus* | * | * | * |  |  |  | [10] |
| *Ara macao* | * | * | * |  |  |  | [9] |
| *Pyrrhura frontalis* | * | * |  |  |  |  | [Present study] |
| *Amazona aestiva* |  | * |  |  |  |  | [Present study] |
| Australian Psittacidae | *Melopsittacus undulatus* |  | * |  | * |  |  | [26] |
| *Nymphicus hollandicus* |  |  |  | * | * |  | [26] |
| African Psittacidae | *Agapornis roseicollis* |  | * | * |  |  | * | [26] |
| *Psittacus erithacus* | * | * | * |  |  |  | [22] |
