# Supplementary material for: Chromosome Painting in Neotropical Long and Short-Tailed Parrots (Aves, Psittaciformes): Phylogeny and Proposal for a Putative Ancestral Karyotype for Tribe Arini
Source: Preprints.org preprint supplement (doi:10.20944/preprints201808.0198.v1), 2018-08-09
Supplement: Supplementary file 4 [file Table 4.docx]

Table 4- Comparison and morphological classification of macrochromosome pairs of 31 species belonging to fourteen genus of Neotropical Psittacidae. A-acrocentric, T- telocentric, SM-submetacentric, MT-metacentric. (-) not described. (*) polymorphic chromosome.

| **Genus** | **Species** | **1** | **2** | **3** | **4** | **5** | **6** | **7** | **8** | **9** | **10** | **References** | **Tail size** |
| --- | --- | --- | --- | --- | --- | --- | --- | --- | --- | --- | --- | --- | --- |
| *Anodorhynchus* | *Anodorhynchus leari* | **MT** | SM | SM | SM | SM | SM | MT | M | SM | MT | [36] | Long tail |
| *Anodorhynchus* | *Anodorhynchus hyacinthinus* | **MT** | A | A | A | SM | SM | MT | SM | SM | MT | [32] | Long tail |
| *Ara* | *Ara chloroptera* | **MT** | A | SM | A | SM | A | MT | MT | T | MT | [8] | Long tail |
| *Ara* | *Ara ararauna* | **MT** | A | SM | A | SM | A | MT | MT | T | MT | [8] | Long tail |
| *Ara* | *Ara macao* | **MT** | A | SM | A | SM | A | MT | MT | T | MT | [8] | Long tail |
| *Propyrrhura* | *Propyrrhura maracana* | **MT** | A | A | A | SM | A | MT | MT | T | MT | [8] | Long tail |
| *Nandayus* | *Nandayus nenday* | **MT** | A | SM | A | SM | A | MT | MT | T | MT | [8] | Long tail |
| *Aratinga* | *Aratinga auricapilla* | **MT** | A | SM | A | SM | A | MT | MT | T | MT | [8] | Long tail |
| *Aratinga* | *Aratinga guarouba* | **MT** | A | SM | A | A | A | SM | MT | MT | - | [37] | Long tail |
| *Aratinga* | *Aratinga acuticaudata* | **MT** | A | SM | A | A | A | SM | MT | MT | - | [37] | Long tail |
| *Aratinga* | *Aratinga finschi* | **MT** | A | A | A | A | A | A | MT | MT | T | [38] | Long tail |
| *Deroptyus* | *Deroptyus accipitrinus* | **MT** | A | A | A | A | SM | MT | MT | T | T | [32] | Long tail |
| *Myiopsitta* | *Myiopsitta monachus* | **MT** | SM | MT | MT | MT | SM | MT | MT | MT | MT | [39] | Long tail |
| *Pyrrhura* | *Pyrrhura frontalis* | **MT** | A | * | A | A | T | T | T | T | T | [In this study] | Long tail |
| *Pyrrhura* | *Pyrrhura molinae* | **A** | **MT** | A | A | SM | T | T | T | T | T | [8] | Long tail |
| *Triclaria* | *Triclaria malachitacea* | **MT** | A | A | A | A | A | MT | MT | MT | MT | [38] | Long tail |
| *Forpus* | *Forpus xanthopterygius* | **MT** | MT | T | A | MT | T | T | T | - | - | [31] | Short tail |
| *Pionus* | *Pionus maximiliani* | A | A | A | A | A | T | T | - | - | - | [40] | Short tail |
| *Pionus* | *Pionus mestruus* | A | A | A | A | A | T | T | - | **-** | - | [8] | Short tail |
| *Pionus* | *Pionus* seniloides | A | A | A | A | T | A | T | - | - | - | [8] | Short tail |
| *Graydidascalus* | *Graydidascalus brachyurus* | A | A | A | A | A | A | MT | MT | - | - | [40] | Short tail |
| *Salvatoria* | *Salvatoria xanthops* | A | SM | SM | SM | SM | T | MT | MT | - | - | [21] | Short tail |
| *Amazona* | *Amazona aestiva* | T | SM | A | SM | T | T | T | T | MT | A | [39] | Short tail |
| *Amazona* | *Amazona amazonica* | T | A | A | SM | T | T | T | MT | - | - | [21] | Short tail |
| *Amazona* | *Amazona brasiliensis* | T | SM | A | SM | T | T | T | MT | - | - | [21] | Short tail |
| *Amazona* | *Amazona festiva* | T | A | SM | SM | T | T | T | MT | - | - | [21] | Short tail |
| *Amazona* | *Amazona kawalli* | T | SM | A | SM | T | T | T | MT | - | - | [21] | Short tail |
| *Amazona* | *Amazona ochrocephala* | T | A | SM | SM | T | T | T | MT | - | - | [21] | Short tail |
| *Amazona* | Amazona rhodocorytha | T | SM | A | SM | T | T | T | MT | - | - | [21] | Short tail |
| *Amazona* | *Amazona farinosa* | T | SM | SM | SM | T | T | T | MT | - | - | [21] | Short tail |
| *Amazona* | Amazona vinacea | T | SM | SM | SM | T | T | T | MT | - | - | [21] | Short tail |
